# Supplementary material for: Creating and sustaining enabling systems and communities to address social needs: protocol for a living lab social prescribing study
Source: Research Square preprint supplement (doi:10.21203/rs.3.rs-6461338/v1), 2025-05-08
Supplement: Supplementary file 1 [file ee37bc50b304827520ef95d9.docx]

Table 2: Project logic and theory of change statement

| **Objective:** To co-design, implement, and evaluate a place-based, technology enabled model of social prescribing | | | | |
| --- | --- | --- | --- | --- |
| **Needs statement.**  Australians are experiencing unprecedented financial stress, homelessness, food insecurity, and loneliness/social isolation. Social prescribing provides non-clinical referral pathways for people to access support for social needs. It is important for social prescribing to be place-based and co-designed by key stakeholders, and rigorously evaluated for effectiveness and social impact. | | | | |
| 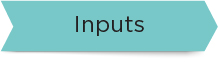 | 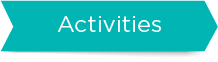 | 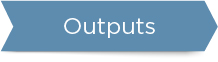 | **System Outcomes** | **Client Outcomes** |
| Funding from the ARC and Partners:   - Staff - Software development - Community directories - Participant reimbursement - Co-design workshop catering - Photovoice and co-design materials   In-kind Partner Contributions:   - Participant recruitment support - Facilities - Participation in co-design - Participation in steering committee - Implementation support - Evaluation support - Scalability and sustainability assessment - Access to Kaleidoscope Social Prescribing Software - Training in use of software - Access to data - Marketing - Knowledge dissemination   Research Staff Contributions:   - Project leadership - Scholarly contribution to project design, data collection, and analysis - Co-design workshop facilitation - Reporting and knowledge dissemination | Photovoice study to inform co-design  Co-design of social prescribing system  Adapting and enhancing social prescribing software  Development and implementation of program branding and awareness campaign  Employment of 2 additional Link Workers  Training in the social prescribing system and software  Service directories - development and maintenance  Co-designing an implementation and evaluation plan  Implementation of co-designed social prescribing system and software  Quantitative and qualitative evaluation  Scalability and sustainability evaluation  Development of strategy for incremental sharing of learning  Communication of outcomes to policymakers, stakeholders, and communities | A co-designed model of place-based social prescribing for Australia  Marketing of social prescribing to health and social care providers and community – conceptual model, plan, and materials  Social prescribing system (including validated tools for assessment, triage, and referral pathways)  Enhanced and tailored social prescribing software  Tools and methods for needs assessment and mapping of community assets  Model of knowledge dissemination for sharing incremental learning throughout the project | Demonstrated Social Return on Investment  Social and health care providers within a sustainable, digitally mature system of social prescribing that have satisfaction with their ability to provide care to engaged clients. These outcomes will be measured by qualitative data during the evaluation.  Enhanced partner connection to, and integration with, other service systems. This will be measured by quantitative data gathered during the evaluation, which will include:   - Increased referral of vulnerable people into and out of the program measured by the number of referrals made and received during the evaluation period - Pre- and post-measurement of ratings pertaining to how much partners are connected with each other as a service system, connected with other service systems, and the extent to which issues, gaps and opportunities in the region are identified and responded to   A developed and maintained directory of community services | Improvement in client wellbeing and social connection, as well as service satisfaction. These outcomes will be measured by quantitative and qualitative data gathered during the evaluation  Quantitative data will include:   - Pre- and post-measurement of wellbeing, measured by the Personal Wellbeing Index and Structural Wellbeing Index - Pre- and post-measurement of social connection, measured by the Campaign to End Loneliness Tool (CtELT) - Changes reported in community participation and social connections - Satisfaction with care |
| **Theory of change statement**  Social needs, such as housing, income, and food insecurity and loneliness and social isolation, are having an unprecedented effect on vulnerable Australians. Those most in need are either not accessing social and community services to address their needs or find there are no services available in their communities. Instead, many Australians are approaching General Practitioners (GPs) or other health professionals with these needs. Up to 35% of GP consultations are for non-medical (social) needs such as those described above, particularly in areas of socio-economic disadvantage. Health practitioners in our pilot research told us that social needs presentation led to "clinician burnout", "vicarious trauma", and "compassion fatigue". At the same time, social and community services experience difficulties connecting those at greatest disadvantage to their services: “How do you access invisible populations?”.  Our Project Partners have identified that health services (who see those clients in need) and social and community support sectors (who can address those needs) operate in isolation, which results in vulnerable people falling through the cracks and suffering needlessly. They identified the need for innovations to improve referral pathways between these sectors, as well as community development to ensure local level supports are available to meet the needs of vulnerable Australians.  **This project will**: 1) Identify key elements that constitute enabling systems and communities for social prescribing using Photovoice; 2) Co-design a technology enabled, place-based social prescribing system; 3) Implement the social prescribing system in one community in South Australia; 4) Evaluate the implementation, effectiveness, and Social Return on Investment of the system.  **Assumptions** of the project are that: 1) There are high rates of unmet social needs in Southern Adelaide that are negatively affecting health and wellbeing; 2) The health and social care systems in the community are fragmented; 3) The implementation of technology-enabled social prescribing will improve integration between health and social care; 4) Improved integration will improve the health and wellbeing of those in the community with unmet social needs; 5) Systematically collecting data on community needs and service gaps and overlaps will improve community capacity to address social needs.  The **outcomes** of the project will be increased access to support services for vulnerable members of the community (via a social prescribing model and a Link Worker), improved client wellbeing, reduced burden on health and social service providers, and a strategy for sustainability and scalability of the technology enabled social prescribing system, including a process for community development as part of social prescribing. | | | | |
